# Supplementary material
Source: publisher figshare collection journal article supplement (https://frontiersin.figshare.com/ndownloader/files/24042884)
Supplement: Supplementary file [file 24042884]

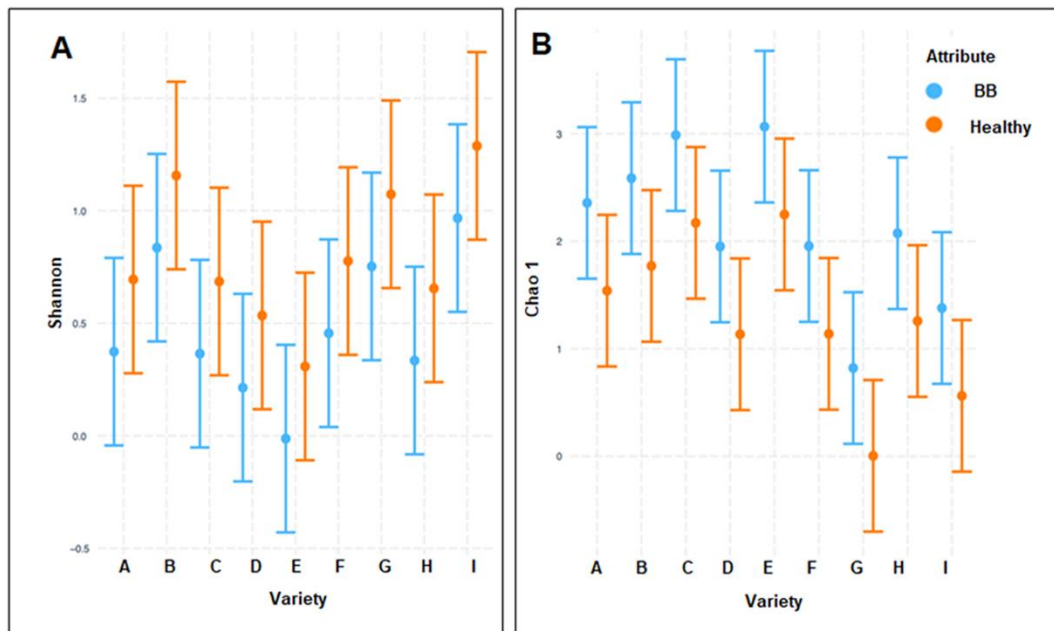

**Supplementary Figure S1. The alpha-diversity indices of the endophytic microbial communities.** A) the Shannon-based true diversity of fungal communities was significantly lower in BB-diseased leaves (TukeyHSD adjusted  $p < 0.05$ ). B) The Chao1 index of the bacterial communities was significantly higher in BB-diseased leaves (adjusted  $p < 0.001$ ).
